# Supplementary material
Source: PubMed Central journal article supplement (PMC3924726)
Supplement: NIHMS538139-supplement-Supplementary_Material.pdf [file NIHMS538139-supplement-Supplementary_Material.pdf]

## Supplementary Material:

*Logistic Regression Model:* The model is a generalized linear model in which we do not directly fit the features (the terminal nucleotide and thermodynamic asymmetry) linearly with the outcomes (silencing efficiency) but attempt to estimate the probability of the siRNA being highly efficient or inefficient in silencing. The reasons for this are two-fold: (1) we include both continuous (energy) and discrete (terminal nucleotide) features, and (2) the relationship between features and outcomes is not linear<sup>(37)</sup>.

Therefore, we apply the logistic regression model, a generalized linear model that assumes the logit (log-odds) of the siRNA being highly efficient are determined by the features:

$$\log\left(\frac{P(\text{high}|X)}{P(\text{med}|X)}\right) = \beta_0 + \beta^T X \quad [1]$$

in which  $P(\text{high}|X)$  is the probability that the siRNA (given its feature vector  $X$ ) is highly active, while  $P(\text{med}|X)$  is the average siRNA silencing efficiency, so  $P(\text{high}|X)/P(\text{med}|X)$  represents the “Odds” that the siRNA stands out as a “good” siRNA. In a logistic regression model, the odds are associated with an exponential function of the linear combination of the features.

Silencing is a discrete Poisson process, and the frequencies of silencing are subject to an exponential distribution. Therefore, we can relate the odds of good silencing and the sequence features with exponential functions.

Similarly, the log-odds of the siRNA being inefficient are determined as:

$$\log\left(\frac{P(\text{low}|X)}{P(\text{med}|X)}\right) = \beta'_0 + \beta'^T X \quad [2]$$

The model predicts the posterior probability of siRNA being highly efficient and inefficient:

$$P(\text{high}|X) = \frac{\exp(\beta_0 + \beta^T X)}{1 + \exp(\beta_0 + \beta^T X) + \exp(\beta_0' + \beta'^T X)} \quad [3]$$

$$P(\text{med}|X) = \frac{1}{1 + \exp(\beta_0 + \beta^T X) + \exp(\beta_0' + \beta'^T X)} \quad [4]$$

$$P(\text{low}|X) = \frac{\exp(\beta_0' + \beta'^T X)}{1 + \exp(\beta_0 + \beta^T X) + \exp(\beta_0' + \beta'^T X)} \quad [5]$$

The siRNAs in the datasets are divided into three groups (high/med/low) based on their activity (discretization with equal frequency), and we use Maximum Likelihood Estimation to learn the parameters in the logistic regression model.

*EGFP sequence 5' to 3' (targeted regions highlighted; darker highlights indicate overlapping target regions):*

atggtgagcaagggcgaggagctgtcaccgggggtggtgccatcctggtcgagctggacggcgacgtaaacggccacaagttcagcgt  
gtccggcgagggcgagggcgatgccacctacggcaagctgaccctgaagtcatctgcaccaccggcaagctgcccgtgccttgccc  
acctcgtgaccaccctgacctacggcgtgcagtgttcagccgctaccccgaccacatgaagcagcagcacttctcaagtcgccatgc  
ccgaaaggctacgtccaggagcgcaccatcttcaaggacgacggcaactacaagaccgcgccgaggtgaagttcgagggcgacac  
cctggtgaaccgcatcgagctgaaggcgcacgacttcaaggaggacggcaacatcctggggcacaagctggagtacaactacaacagcc  
acaacgtctatatcatggccgacaagcagaagaacggcgcacgaggtgaactcaagatccgccacaacatcgaggacggcagcgtgcag  
ctgccgaccactaccagcagaacacccccatcggcgacggccccgtgctgctgcccgacaaccactacctgagcaccagtcgccct  
gagcaaagaccccaacgagaagcgcgatcacatggtcctgctggagttcgtgaccgccgggatcactctcggcatggacgagctgt  
acaagaagcttagccatggcttcccgggaggtggaggagcagatgatggcacgctgcccattgtcttgcccaggagagcgggatg  
gacctcaccctgcagcctgtgcttctgctagatcaatgtgtag

*PKR sequence 5' to 3' (targeted regions highlighted; darker highlights indicate overlapping target regions):*

aagctccaaccaggatcacgggaagaagaatggctggtgatcttcagcaggtttctcatggaggaacttaatacataccgtcagaagca  
gggagtagtacttaaatcaagaactgcctaattcaggaccccatgataggaggtttacattcaagttataatagatggaagagaatttc  
cagaa**ggtgaaggtagatcaaga**aggaagcaaaaaatgccgcagccaaattagctggtgagatacttaataaggaaaagaaggcagta  
gtcctttatttgacaacaacgaattctcagaaggattatccatggggaattacat**aggccttatcaatagaatt**gcccagaagaaaagacta  
actgta**aattatgaacagtgtgcat**ggggggtgcatg**ggccagaaggatttcatt**ataaatgcaaaatgggacagaaagaatatagtattggt  
acaggttctactaaacaggaagcaaaacaattggccgctaaacttgcatatcttcagatattatcagaagaaacctcagtgaatctgactacc  
tgcctctggtcttttgcactacgtgtgagcccaagcaactcttagtgaccagcacactcgtcttgaatcatca**ctgaagggtgactctc**  
**agcagat**acatcagagataaattctaacagtgacagtttaaacagttctcgttgcttatgaatggtctcagaaataatcaagggaaggcaaaa  
agatctttggcaccagattgacfttctgacatgaaagaacaagaactgactgtggacaagag**gtttggcatggattttaa**gaaatagaat  
taattggctcaggtggatttggccaagtttcaaagcaaaacacagaattgacggaaagacttacgttattaacgtgtaaatataataac**gag**  
**aaggcgg**agcgtgaagtaaaagcatt**ggcaa**aactgatcatgtaaatattgttactacaatggctgtgggatggattgattatgatcctga  
gaccagtgatgattctctgagagcagtgattatgatcctgagaacagcaaaaatagttcaaggtcaagactaagtgcctttatccaaatg  
gaattctgtgataaaggaccttggacaatggattgaaaaagaagaggcgagaaactagacaaagtt**ttggctttggaactcttt**gaaaa  
ataacaaaaggggtggattatatacattcaaaaaaattatcatagagatcttaagccaagtaataatcttagtagatacaaaacaagtaaa  
gattggagactttggacttgaacatctctgaaaaatgatggaaagcgaacaaggagtaagggaactttgcgatacatgagcccagaacag  
attcttcgaagactatggaaaggagtgacctctacgctttggggctaattcttctgactcttcatgtatgtgacactgcttttgaacat  
caaagttttcacagacctacgggatggcatcatctcagatatattgataaaaaagaaaaactctctacagaaattactcacaagaaacct  
gaggatcgaactaacacatctgaaataactaaggacctgactgtgtggaagaaaagcccagagaaaaatgaacgacacacatgtagagc  
ccttctgaaaaagtatcctgcttctgatatgcagtttcttaaatatctaaaatctgtagggaatatcaatagatatttacttttatttaattg  
ctttaaattttactattttactaatctttctgcagaaacagaaaggtttctttttgcttcaaaaacattcttacattttacttttctggtcactct  
ttattctttcttttttaaaagacagagctcgtctgttggccaggetggagtgcaatgacacagcttggctcactgcaactctgctcttggg  
ttcaagtattctcctgcctcagcctcctgagtagctggattacaggeatgtgccaccaccactaatttttgttttaataaaagacaggggt  
tcaccatgttggccaggtggtctcaactcctgacctcaagtaatccacctgcctcggcctccaaagtgtgggattacagggatgagcc  
accgcgccagcctcatctctttgtctaaagatgaaaaaccacccccaaatftttttatactattaatgaatcaatcaattcatatctattatt  
aaatttctaccgcttttagccaaaaaaatgtaagatcgttctctgcctcacatagcttacaagccagctggagaaatatggtactcattaaaa  
aaaaaaaaaaaa

*Dharmacon EGFP selection output (sorted by Dharmacon “Score”):*

| <b>Sense Strand Sequence</b> | <b>Start Pos</b> | <b>GC %</b> | <b>Score</b> | <b>Algorithm Rank</b> |
|------------------------------|------------------|-------------|--------------|-----------------------|
| GGCACAAGCTGGAGTACAA          | 416              | 53          | 91           | 17                    |
| AGGTGAAGTTCGAGGGCGA          | 335              | 58          | 87           | 140                   |
| CCGCCATGCCCGAAGGCTA          | 260              | 68          | 83           | 31                    |
| TGGACGAGCTGTACAAGAA          | 701              | 47          | 83           | 107                   |
| ACTTCAAGGAGGACGGCAA          | 389              | 53          | 81           | 279                   |
| GCAAAGACCCCAACGAGAA          | 626              | 53          | 81           | 120                   |
| TCTTCAAGGACGACGGCAA          | 299              | 53          | 80           | 313                   |
| GCATCGACTTCAAGGAGGA          | 383              | 53          | 79           | 100                   |
| GCATGGACGAGCTGTACAA          | 698              | 53          | 79           | 66                    |
| CGCCGGAGGTGGAGGAGCA          | 737              | 74          | 79           | 14                    |
| AGGTGGAGGAGCAGGATGA          | 743              | 58          | 79           | 37                    |
| GCGCCGAGGTGAAGTTCGA          | 329              | 63          | 78           | 13                    |
| AGAACGGCATCAAGGTGAA          | 476              | 47          | 77           | 188                   |
| TGGTCGAGCTGGACGGCGA          | 47               | 68          | 76           | 178                   |
| GGCCACAAGTTCAGCGTGT          | 73               | 58          | 76           | 135                   |
| CCGGCGAGGGCGAGGGCGA          | 92               | 84          | 75           | 98                    |
| TGGCCGACAAGCAGAAGAA          | 461              | 53          | 75           | 67                    |
| CTGCTAGGATCAATGTGTA          | 827              | 42          | 75           | n/a                   |
| ACATGAAGCAGCACGACTT          | 233              | 47          | 74           | 302                   |
| CCATCTTCTTCAAGGACGA          | 293              | 47          | 74           | 133                   |
| CGGAGGTGGAGGAGCAGGA          | 740              | 68          | 74           | 33                    |
| GCCACAACGTCTATATCAT          | 443              | 42          | 73           | 180                   |
| ACGAGAAGCGCGATCACAT          | 638              | 53          | 73           | 321                   |
| GTACAAGAAGCTTAGCCAT          | 711              | 42          | 73           | 551                   |
| ACGTAAACGGCCACAAGTT          | 65               | 47          | 72           | 232                   |
| GTAACCGGCCACAAGTTCA          | 67               | 47          | 72           | 108                   |
| GCACCATCTTCTTCAAGGA          | 290              | 47          | 72           | 45                    |
| GCAAGGGCGAGGAGCTGTT          | 8                | 63          | 71           | 216                   |
| CGAGCTGGACGGCGACGTA          | 51               | 68          | 71           | 6                     |
| CCTACGGCGTGCAGTGCTT          | 197              | 63          | 71           | 280                   |
| GGGCACAAGCTGGAGTACA          | 415              | 58          | 71           | 1                     |
| TCTATATCATGGCCGACAA          | 452              | 42          | 71           | 223                   |
| AAGAACGGCATCAAGGTGA          | 475              | 47          | 71           | 157                   |
| GCAAGCTGACCCTGAAGTT          | 122              | 53          | 70           | 211                   |
| ACAAGCTGGAGTACAATA           | 419              | 42          | 70           | 105                   |
| CCGACCACTACCAGCAGAA          | 539              | 58          | 70           | 88                    |
| ACATGGTCCTGCTGGAGTT          | 653              | 53          | 70           | 304                   |
| TGAGCAAGGGCGAGGAGCT          | 5                | 63          | 69           | 577                   |
| AGCTGGACGGCGACGTAAA          | 53               | 58          | 69           | 35                    |

|                       |     |    |    |     |
|-----------------------|-----|----|----|-----|
| TGAACCGCATCGAGCTGAA   | 362 | 53 | 69 | 208 |
| GCAACATCCTGGGGCACAA   | 404 | 58 | 69 | 93  |
| ACAACAGCCACAACGTCTA   | 437 | 47 | 69 | 114 |
| AAGCAGAAGAACGGCATCA   | 469 | 47 | 69 | 55  |
| GCGTGCAGCTCGCCGACCA   | 527 | 74 | 69 | 40  |
| TCGGCATGGACGAGCTGTA   | 695 | 58 | 69 | 68  |
| GCGTGTCCGGCGAGGGCGA   | 86  | 79 | 68 | 79  |
| GTGCAGTGCTTCAGCCGCT   | 205 | 63 | 68 | 276 |
| AGGACGACGGCAACTACAA   | 305 | 53 | 68 | 63  |
| AGTACAACACTACAACAGCCA | 428 | 42 | 68 | 229 |
| ACGTCTATATCATGGCCGA   | 449 | 47 | 68 | 141 |

*Ambion EGFP Selection Output (sorted by ascending target position):*

| <b>Target</b>                               | <b>Position</b> | <b>% GC</b> | <b>Algorithm Rank</b> |
|---------------------------------------------|-----------------|-------------|-----------------------|
| Target sequence 1: AAGGGCGAGGAGCTGTTACCC    | 12              | 61.9        | 369                   |
| Target sequence 2: AAACGGCCACAAGTTCAGCGT    | 71              | 52.4        | 342                   |
| Target sequence 3: AAGTTCAGCGTGTCCGGCGAG    | 81              | 61.9        | 481                   |
| Target sequence 4: AAGCTGACCCTGAAGTTCATC    | 126             | 47.6        | 418                   |
| Target sequence 5: AAGTTCATCTGCACCACCGGC    | 138             | 57.1        | 721                   |
| Target sequence 6: AAGCTGCCCCGTGCCCTGGCCC   | 159             | 76.2        | 700                   |
| Target sequence 7: AAGCAGCACGACTTCTTCAAG    | 240             | 47.6        | 263                   |
| Target sequence 8: AAGTCCGCCATGCCCGAAGGC    | 258             | 66.7        | 602                   |
| Target sequence 9: AAGGCTACGTCCAGGAGCGCA    | 274             | 61.9        | 38                    |
| Target sequence 10: AAGGACGACGGCAACTACAAG   | 306             | 52.4        | 239                   |
| Target sequence 11: AACTACAAGACCCGCGCCGAG   | 318             | 61.9        | 499                   |
| Target sequence 12: AAGACCCGCGCCGAGGTGAAG   | 324             | 66.7        | 269                   |
| Target sequence 13: AAGTTCGAGGGCGACACCCTG   | 342             | 61.9        | 510                   |
| Target sequence 14: AACCGCATCGAGCTGAAGGGC   | 366             | 61.9        | 587                   |
| Target sequence 15: AAGGGCATCGACTTCAAGGAG   | 381             | 52.4        | 275                   |
| Target sequence 16: AAGGAGGACGGCAACATCCTG   | 396             | 57.1        | 389                   |
| Target sequence 17: AACATCCTGGGGCACAAAGCTG  | 408             | 57.1        | 569                   |
| Target sequence 18: AAGCTGGAGTACAACACTACAAC | 423             | 42.9        | 398                   |
| Target sequence 19: AACTACAACAGCCACAACGTC   | 435             | 47.6        | 628                   |
| Target sequence 20: AACAGCCACAACGTCTATATC   | 441             | 42.9        | 331                   |
| Target sequence 21: AACGTCTATATCATGGCCGAC   | 450             | 47.6        | 391                   |
| Target sequence 22: AAGCAGAAGAACGGCATCAAG   | 471             | 47.6        | 264                   |
| Target sequence 23: AAGAACGGCATCAAGGTGAAC   | 477             | 47.6        | 541                   |
| Target sequence 24: AACGGCATCAAGGTGAACTTC   | 480             | 47.6        | 206                   |
| Target sequence 25: AAGGTGAACTTCAAGATCCGC   | 489             | 47.6        | 658                   |
| Target sequence 26: AACTTCAAGATCCGCCACAAC   | 495             | 47.6        | 503                   |

|                                           |     |      |     |
|-------------------------------------------|-----|------|-----|
| Target sequence 27: AAGATCCGCCACAACATCGAG | 501 | 52.4 | 470 |
| Target sequence 28: AACATCGAGGACGGCAGCGTG | 513 | 61.9 | 488 |
| Target sequence 29: AACACCCCATCGGCGACGGC  | 558 | 71.4 | 630 |
| Target sequence 30: AACCACTACCTGAGCACCCAG | 597 | 57.1 | 416 |
| Target sequence 31: AAAGACCCCAACGAGAAGCGC | 630 | 57.1 | 757 |
| Target sequence 32: AACGAGAAGCGCGATCACATG | 639 | 52.4 | 237 |
| Target sequence 33: AAGCGCGATCACATGGTCCTG | 645 | 57.1 | 270 |
| Target sequence 34: AAGAAGCTTAGCCATGGCTTC | 717 | 47.6 | 543 |
| Target sequence 35: AAGCTTAGCCATGGCTTCCCG | 720 | 57.1 | 722 |

*Dharmacon PKR selection output (sorted by Dharmacon "Score"):*

| <b>Sense Strand Sequence</b> | <b>Start Pos</b> | <b>GC %</b> | <b>Score</b> | <b>Algorithm Rank</b> |
|------------------------------|------------------|-------------|--------------|-----------------------|
| CAAATTAGCTGTTGAGATA          | 234              | 32          | 104          | 481                   |
| GATCAAAGAAGGAAGCAAA          | 203              | 37          | 96           | 506                   |
| GAAGAAAAGCCCAGAGAAA          | 1647             | 42          | 96           | 418                   |
| AGAAGAAACCTCAGTGAAA          | 531              | 37          | 95           | 556                   |
| CCACATGATAGGAGGTTTA          | 136              | 42          | 94           | 30                    |
| TATAATAGATGGAAGAGAA          | 165              | 26          | 92           | 1165                  |
| GATCTTAAGCCAAGTAATA          | 1270             | 32          | 92           | 28                    |
| CAAGCCAGCTGGAGAAATA          | 2346             | 47          | 92           | 162                   |
| GAAATTACTCTCAAAGAAA          | 1578             | 26          | 91           | 562                   |
| CTACTAAACAGGAAGCAAA          | 473              | 37          | 90           | 723                   |
| GTTCAAGGTCAAAGACTAA          | 1091             | 37          | 90           | 313                   |
| AGAAATGGCTGGTGATCTT          | 27               | 42          | 89           | 1159                  |
| ATGAATGGTCTCAGAAATA          | 715              | 32          | 89           | 47                    |
| CAAAGTATACTGTGGACAA          | 794              | 37          | 88           | 920                   |
| CAAATGGAATTCTGTGATA          | 1123             | 32          | 88           | 480                   |
| GCGAGAACTAGACAAAGT           | 1178             | 42          | 88           | 566                   |
| GAAATATGGTACTCATTAA          | 2359             | 26          | 88           |                       |
| GGAAAGCGAACAAGGAGTA          | 1357             | 47          | 87           | 92                    |
| GAAAGGAAGTGGACCTCTA          | 1427             | 47          | 87           | 419                   |
| AGAAATTACTCTCAAAGAA          | 1577             | 26          | 87           | 528                   |
| AGTTATAATAGATGGAAGA          | 162              | 26          | 86           | 401                   |
| CAGATACATCAGAGATAAA          | 659              | 32          | 86           | 139                   |
| CATCAGAGATAAATTCTAA          | 665              | 26          | 86           | 551                   |
| CGGAAAGACTTACGTTATT          | 897              | 37          | 86           | 126                   |
| ACGAGAAGGCGGAGCGTGA          | 935              | 63          | 86           | 308                   |
| AAGTAAAAGCATTGGCAAA          | 953              | 32          | 86           | 774                   |
| AGTTCAAGGTCAAAGACTA          | 1090             | 37          | 86           | 393                   |
| TGGAGGAACTTAATACATA          | 62               | 32          | 85           | 125                   |
| CATGAAAGAAACAAAGTAT          | 783              | 26          | 85           | 1233                  |

|                      |      |    |    |      |
|----------------------|------|----|----|------|
| AGGCGAGAACTAGACAAA   | 1176 | 42 | 85 | 83   |
| GTAAGGGAACCTTTGCGATA | 1373 | 42 | 85 | 270  |
| TCTCAGATATATTTGATAA  | 1538 | 21 | 85 | 404  |
| CGACCTAACACATCTGAAA  | 1606 | 42 | 85 | 48   |
| TGTTAGAGCCCTTCTGAAA  | 1681 | 42 | 85 | 758  |
| GAGAATTTCCAGAAGGTGA  | 179  | 42 | 84 | 213  |
| GCAAAATGGGACAGAAAGA  | 434  | 42 | 84 | 93   |
| CAGGATACGGGAAGAAGAA  | 12   | 47 | 84 | 296  |
| TTTTAAAGAAATAGAATTA  | 828  | 11 | 84 | 407  |
| GAATTGACGGAAAGACTTA  | 890  | 37 | 84 | 168  |
| GGATACGGGAAGAAGAAAT  | 14   | 42 | 84 | 906  |
| GCTAATTCTTGCTGAACTT  | 1455 | 37 | 84 | 824  |
| ATTCATATCTATTTATTAA  | 2269 | 11 | 84 | 97   |
| AATAGATGGAAGAGAATTT  | 168  | 26 | 83 | 1122 |
| CTGTTGAGATACTTAATAA  | 242  | 26 | 83 | 150  |
| AAGACTAACTGTAAATTAT  | 366  | 21 | 83 | 966  |
| GGACAGAAAGAATATAGTA  | 442  | 32 | 83 | 36   |
| GCAGATACATCAGAGATAA  | 658  | 37 | 83 | 77   |
| CTCCTGACATGAAAGAAA   | 775  | 37 | 83 | 524  |
| AGGCGGAGCGTGAAGTAAA  | 941  | 53 | 83 | 52   |
| GCAAGACTATGGAAAGGAA  | 1416 | 42 | 83 | 563  |

*Ambion PKR Selection Output (sorted by ascending target position):*

| <b>Target</b>                             | <b>Position</b> | <b>% GC</b> | <b>Algorithm Rank</b> |
|-------------------------------------------|-----------------|-------------|-----------------------|
| Target sequence 1: AAGCTTCCAACCAGGATACGG  | 1               | 52.4        | 1581                  |
| Target sequence 2: AACCAGGATACGGGAAGAAGA  | 9               | 47.6        | 164                   |
| Target sequence 3: AAGAAGAAATGGCTGGTGATC  | 23              | 42.9        | 1731                  |
| Target sequence 4: AAGAAATGGCTGGTGATCTTT  | 26              | 38.1        | 970                   |
| Target sequence 5: AAATGGCTGGTGATCTTTCAG  | 29              | 42.9        | 1394                  |
| Target sequence 6: AACTTAATACATACCGTCAGA  | 68              | 33.3        | 709                   |
| Target sequence 7: AATACATACCGTCAGAAGCAG  | 73              | 42.9        | 2295                  |
| Target sequence 8: AAGCAGGGAGTAGTACTTAAA  | 88              | 38.1        | 22                    |
| Target sequence 9: AAATATCAAGAACTGCCTAAT  | 106             | 28.6        | 1062                  |
| Target sequence 10: AAGAACTGCCTAATTCAGGAC | 113             | 42.9        | 1878                  |
| Target sequence 11: AACTGCCTAATTCAGGACCTC | 116             | 47.6        | 1595                  |
| Target sequence 12: AATTCAGGACCTCCACATGAT | 124             | 42.9        | 1416                  |
| Target sequence 13: AAGTTATAATAGATGGAAGAG | 161             | 28.6        | 1673                  |
| Target sequence 14: AATAGATGGAAGAGAATTTCC | 168             | 33.3        | 2265                  |
| Target sequence 15: AAGAGAATTTCCAGAAGGTGA | 177             | 38.1        | 214                   |
| Target sequence 16: AATTTCCAGAAGGTGAAGGTA | 182             | 38.1        | 406                   |
| Target sequence 17: AAGGTGAAGGTAGATCAAAGA | 191             | 38.1        | 61                    |
| Target sequence 18: AAGGTAGATCAAAGAAGGAAG | 197             | 38.1        | 1778                  |

|                                           |     |      |      |
|-------------------------------------------|-----|------|------|
| Target sequence 19: AAAGAAGGAAGCAAAAAATGC | 207 | 33.3 | 1962 |
| Target sequence 20: AAGGAAGCAAAAAATGCCGCA | 211 | 42.9 | 437  |
| Target sequence 21: AAGCAAAAAATGCCGCAGCCA | 215 | 47.6 | 607  |
| Target sequence 22: AAAAAATGCCGCAGCCAAATT | 219 | 38.1 | 1150 |
| Target sequence 23: AAAATGCCGCAGCCAAATTAG | 221 | 42.9 | 1887 |
| Target sequence 24: AATGCCGCAGCCAAATTAGCT | 223 | 47.6 | 1354 |
| Target sequence 25: AAATTAGCTGTTGAGATACTT | 235 | 28.6 | 1172 |
| Target sequence 26: AATAAGGAAAAGAAGGCAGTT | 256 | 33.3 | 1713 |
| Target sequence 27: AAGGAAAAGAAGGCAGTTAGT | 259 | 38.1 | 884  |
| Target sequence 28: AAAAGAAGGCAGTTAGTCCTT | 263 | 38.1 | 1249 |
| Target sequence 29: AAGAAGGCAGTTAGTCCTTTA | 265 | 38.1 | 55   |
| Target sequence 30: AAGGCAGTTAGTCCTTTATTA | 268 | 33.3 | 2    |
| Target sequence 31: AACAACGAATTCTTCAGAAGG | 294 | 38.1 | 1517 |
| Target sequence 32: AACGAATTCTTCAGAAGGATT | 297 | 33.3 | 684  |
| Target sequence 33: AATTCTTCAGAAGGATTATCC | 301 | 33.3 | 2217 |
| Target sequence 34: AAGGATTATCCATGGGGAATT | 311 | 38.1 | 484  |
| Target sequence 35: AATTACATAGGCCTTATCAAT | 328 | 28.6 | 1553 |
| Target sequence 36: AATAGAATTGCCCAGAAGAAA | 346 | 33.3 | 693  |
| Target sequence 37: AATTGCCCAGAAGAAAAGACT | 351 | 38.1 | 1114 |
| Target sequence 38: AAGAAAAGACTAACTGTAAAT | 361 | 23.8 | 1036 |
| Target sequence 39: AAAAGACTAACTGTAAATTAT | 364 | 19   | 961  |
| Target sequence 40: AAGACTAACTGTAAATTATGA | 366 | 23.8 | 105  |



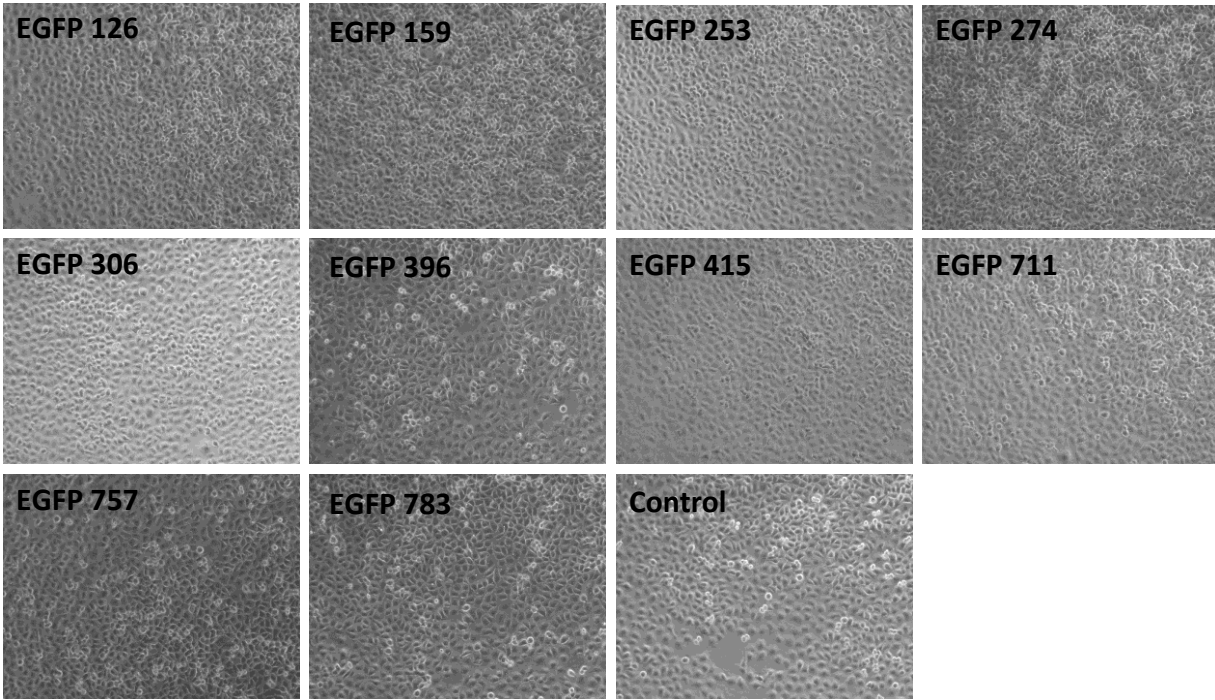

Figure S1: Images and Cytotoxicity Data for siRNA Transfection Experiments.

Treated cells showed no toxicity compared to control cells by microscopic inspection either for GFP experiments (above) or PKR (no images taken). Similar results were obtained when cell toxicity was assayed by CellTiter-Blue (right).

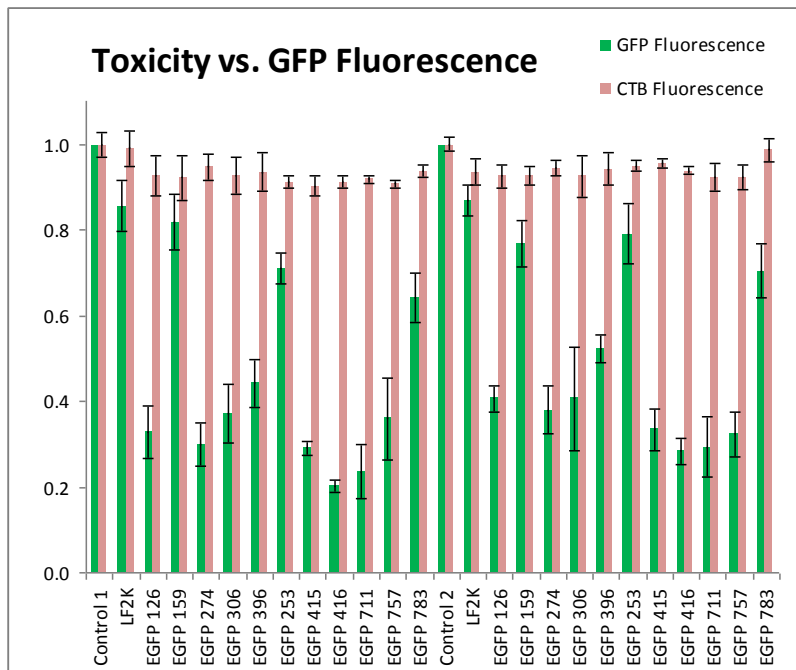

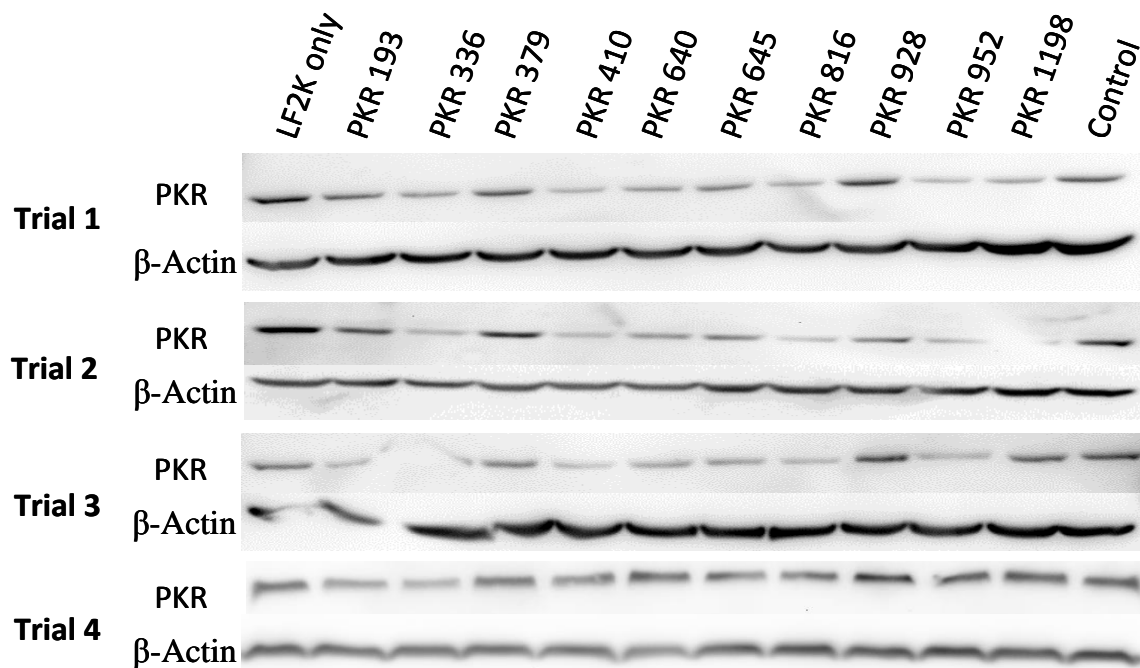

Figure S2: Western Blots for PKR Silencing. The results of the western blotting raw data (above) were quantified and correspond to Figure 4 in the manuscript.
